# Supplementary material
Source: PubMed Central journal article supplement (PMC11105004)
Supplement: 18_2019_3412_MOESM1_ESM.pdf [file 18_2019_3412_MOESM1_ESM.pdf]

# Supplementary Fig. 1

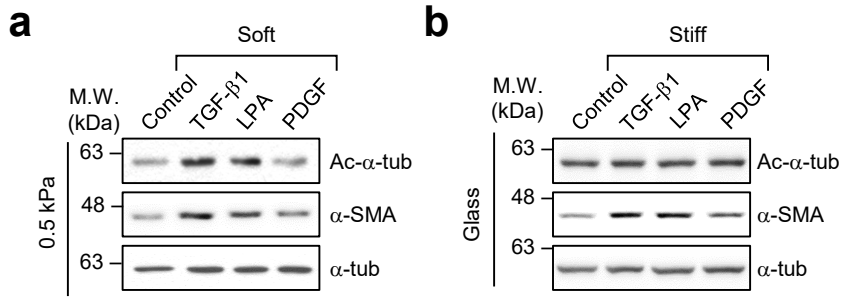

**Supplementary Fig. 1 Increase in acetylated- $\alpha$ -tubulin in MEFs grown on soft matrices is correlated with  $\alpha$ -SMA expression.** a, b Cells were incubated on 0.5 kPa or glass and treated with TGF- $\beta$ 1 (2 ng ml<sup>-1</sup>), LPA (10  $\mu$ M), or PDGF (10 ng ml<sup>-1</sup>) for 8 h. Then, western blotting was performed using antibodies specific for acetylated- $\alpha$ -tubulin and  $\alpha$ -SMA.

# Supplementary Fig. 2

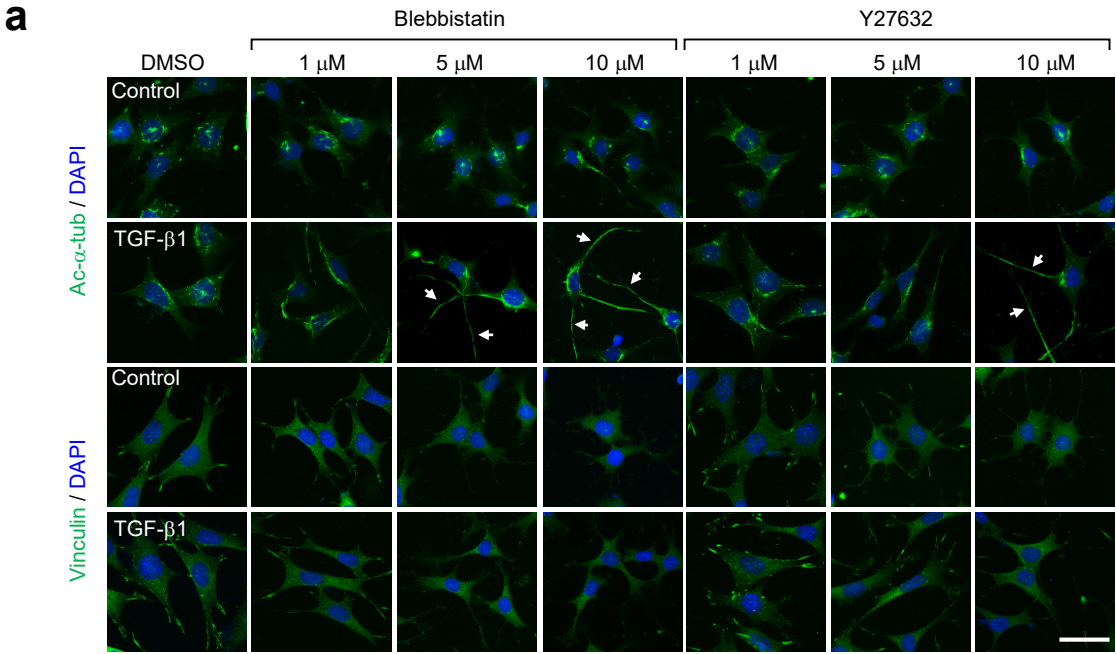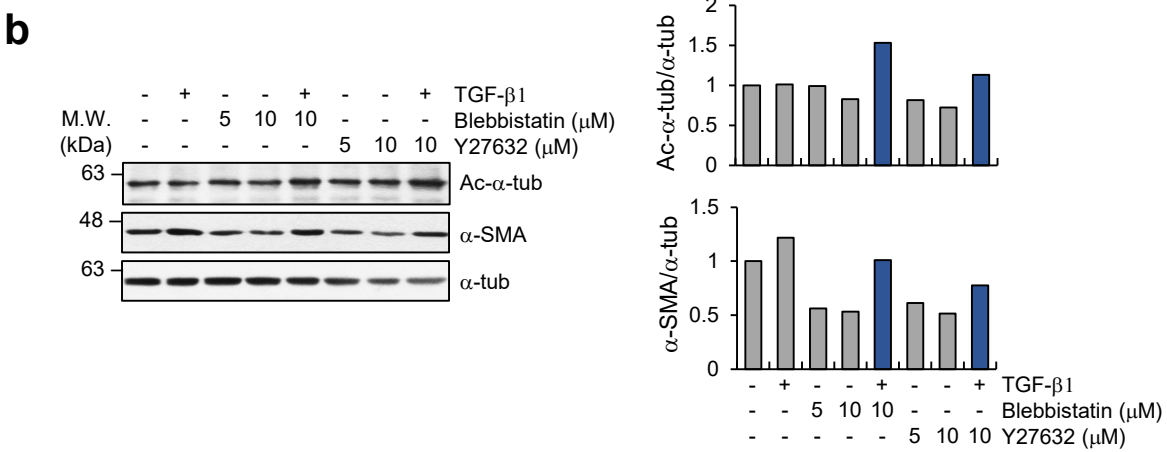

**Supplementary Fig. 2 Acetylated- $\alpha$ -tubulin is increased in low-tension environment.**

**a** Immunofluorescence imaging of MEFs, incubated on fibronectin-coated coverslips and treated with TGF- $\beta$ 1 combined with blebbistatin and Y27632 (1, 5, 10  $\mu$ M), and immunolabeled with antibodies specific for acetylated- $\alpha$ -tubulin and vinculin. Arrow indicates long extended acetylated- $\alpha$ -tubulin. Scale bar, 50  $\mu$ m. **b** Western blotting for acetylated- $\alpha$ -tubulin and  $\alpha$ -SMA in cells incubated as described in (a). Graph shows relative expression of acetylated- $\alpha$ -tubulin and  $\alpha$ -SMA normalized to that of  $\alpha$ -tubulin.

# Supplementary Fig. 3

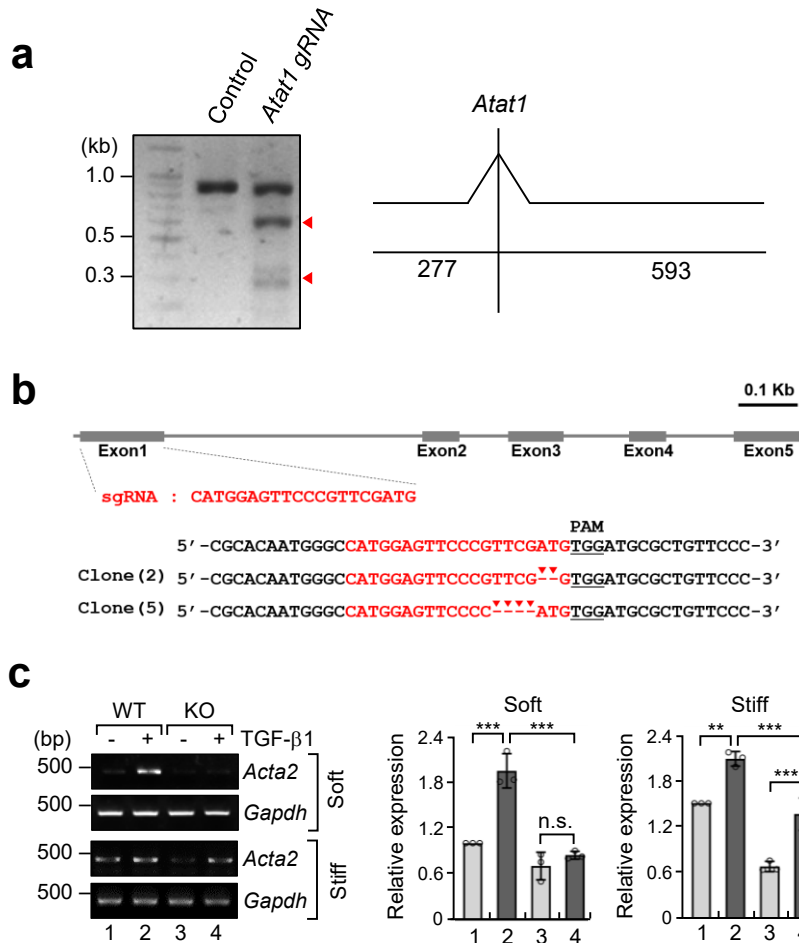

**Supplementary Fig. 3 Generation of  $\alpha$ -TAT1 KO MEFs, and comparison of  $\alpha$ -SMA expression between WT and  $\alpha$ -TAT KO.** **a** Empty PX458 and guide RNA (gRNA) constructs used for insertion were transfected with B16F10 cells, and then selected with puromycin for 1 week. Genomic DNA obtained from puromycin resistant B16F10 cells was amplified (870 bp). PCR products were denatured, re-annealed, and incubated with T7 endonuclease (T7E1) to cleave mismatched DNA. PCR products were excised into two fragments (593 and 277 bp). **b** Validation of  $\alpha$ -TAT1 KO MEFs by genomic DNA sequencing. **c** TGF- $\beta$ 1-induced *Acta2* (encoding  $\alpha$ -SMA) expression was compared between WT and  $\alpha$ -TAT1 KO MEFs in transcripts levels expressed under soft and stiff conditions. Soft: one-way ANOVA,  $F_{3,8} = 44.21$ , stiff: one-way ANOVA,  $F_{3,8} = 69.01$ . The graphs represent the mean of three independent experiments  $\pm$  S.D. with  $p$  values  $p < 0.05$  considered being significant. \*\*  $p < 0.01$ , \*\*\*  $p < 0.005$ .

# Supplementary Fig. 4

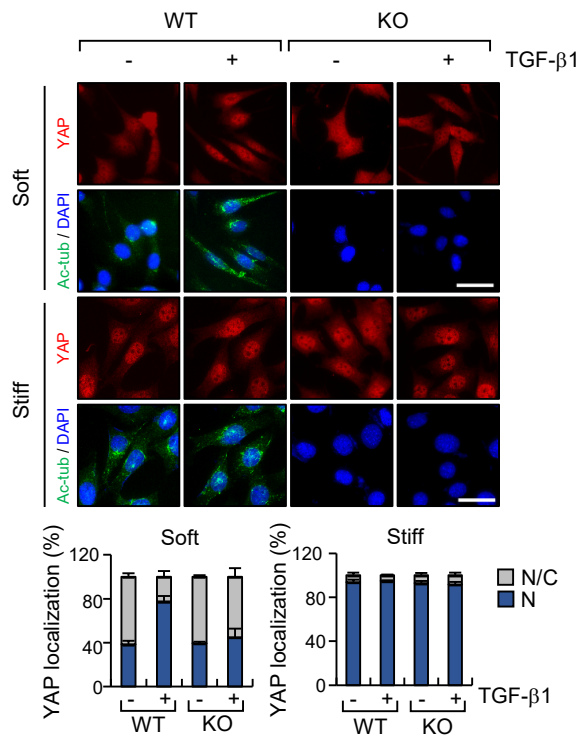

**Supplementary Fig. 4 Microtubule acetylation increases YAP nuclear translocation in MEFs grown on a soft matrix.** WT and  $\alpha$ -TAT1 KO MEFs were seeded on fibronectin-coated soft and stiff matrices and stimulated with TGF- $\beta$ 1 for 8 h. Cells were fixed and labelled with antibodies specific for YAP and acetylated  $\alpha$ -tubulin. Graphs show the quantification of YAP cellular localization in MEFs grown on soft and stiff matrices. N; nucleus, C; cytosol. Scale bar, 50  $\mu$ m.

# Supplementary Fig. 5

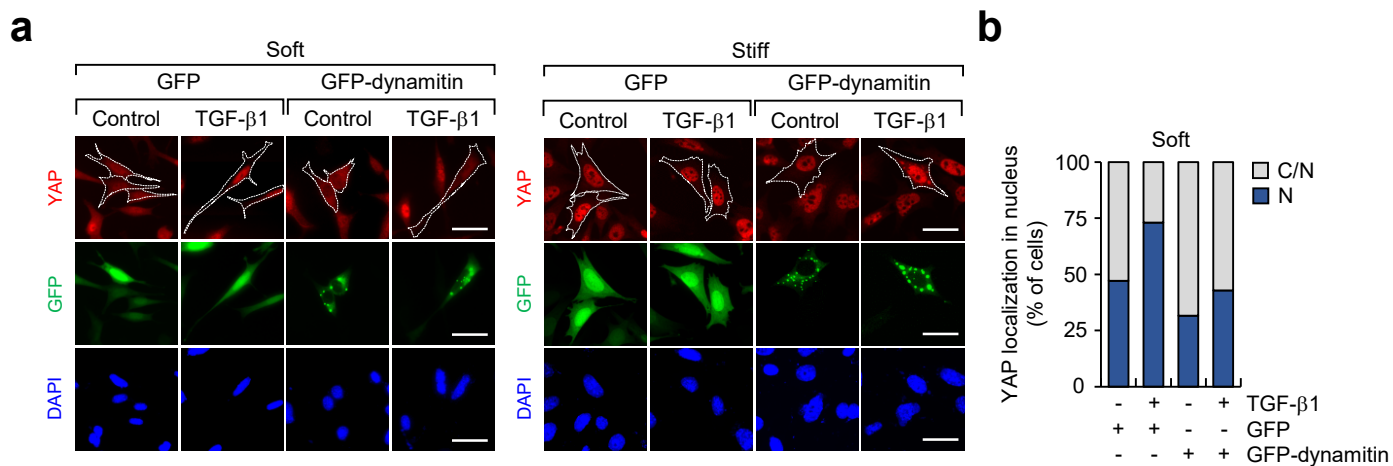

**Supplementary Fig. 5 Overexpression of dynamitin suppresses TGF- $\beta$ 1-induced YAP nuclear translocation on soft matrices.** **a** WT MEFs were transfected with GFP and GFP-dynamitin for 24 h and seeded on fibronectin-coated 0.5 kPa PAG and glass with or without TGF- $\beta$ 1 for 8 h. Cells were then fixed and immunocytochemistry was performed using an antibody specific for YAP. Dotted lines indicate GFP-expressing cells. Scale bar, 50  $\mu$ m. **b** Quantification of YAP cellular localization in MEFs grown on soft matrices. N; nucleus, C; cytosol.

# Supplementary Fig. 6

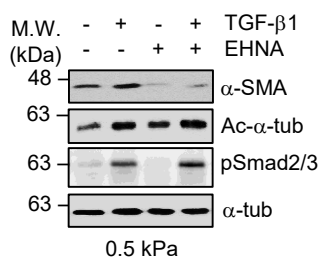

**Supplementary Fig. 6 Inhibition of dynein activity does not affect TGF- $\beta$ 1-induced microtubule acetylation and total Smad phosphorylation in MEFs grown on soft matrices.** MEFs were incubated on a soft matrix and treated with TGF- $\beta$ 1 and/or EHNA for 8 h. Then the cells were lysed and subjected to western blotting using antibodies specific for  $\alpha$ -SMA, acetylated  $\alpha$ -tubulin, and phospho-Smad2/3.

# Supplementary Fig. 7

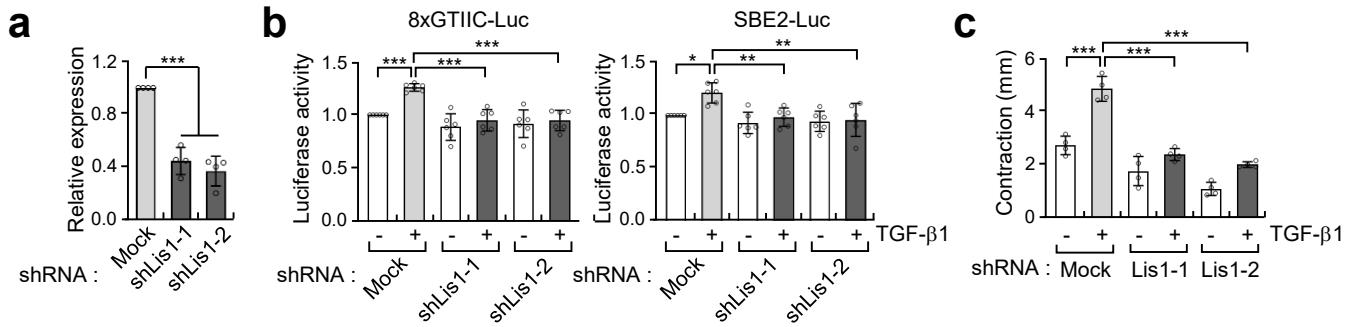

**Supplementary Fig. 7 Knockdown of Lis1 to inhibit the dynein function suppresses transcriptional activities of YAP and Smad upon TGF-β1 on soft matrices.** **a** Generation of Lis1 knockdown cell line using shRNA lentiviral infection. Knockdown efficiency of Lis1 was verified by RT-qPCR.  $n = 4$  from two independent experiments are presented. One-way ANOVA,  $F_{2,9} = 61.26$ . **b** Transcriptional activity of YAP and Smad was compared by the luciferase assay in Lis1 KD cell lines upon TGF-β1 stimulation on soft matrix.  $n = 6$  from three independent experiments are presented. 8xGTIIIC-Luc: one-way ANOVA,  $F_{5,30} = 12.40$ , SBE2-Luc: one-way ANOVA,  $F_{5,30} = 6.622$ . **c** Collagen matrices containing Mock and Lis1 KD cells (shLis1-1 and shLis1-2) were incubated for 12 h under floating condition with TGF-β1. The contractility of cells was measured using the reduction in the perimeter of the collagen gel.  $n = 4$  from two independent experiments are presented. One-way ANOVA,  $F_{5,30} = 52.37$ . Data are represented as mean  $\pm$  S.D. with  $p$  values  $p < 0.05$  considered being significant. \* $p < 0.05$ , \*\* $p < 0.01$ , \*\*\* $p < 0.005$ .

# Supplementary Fig. 8

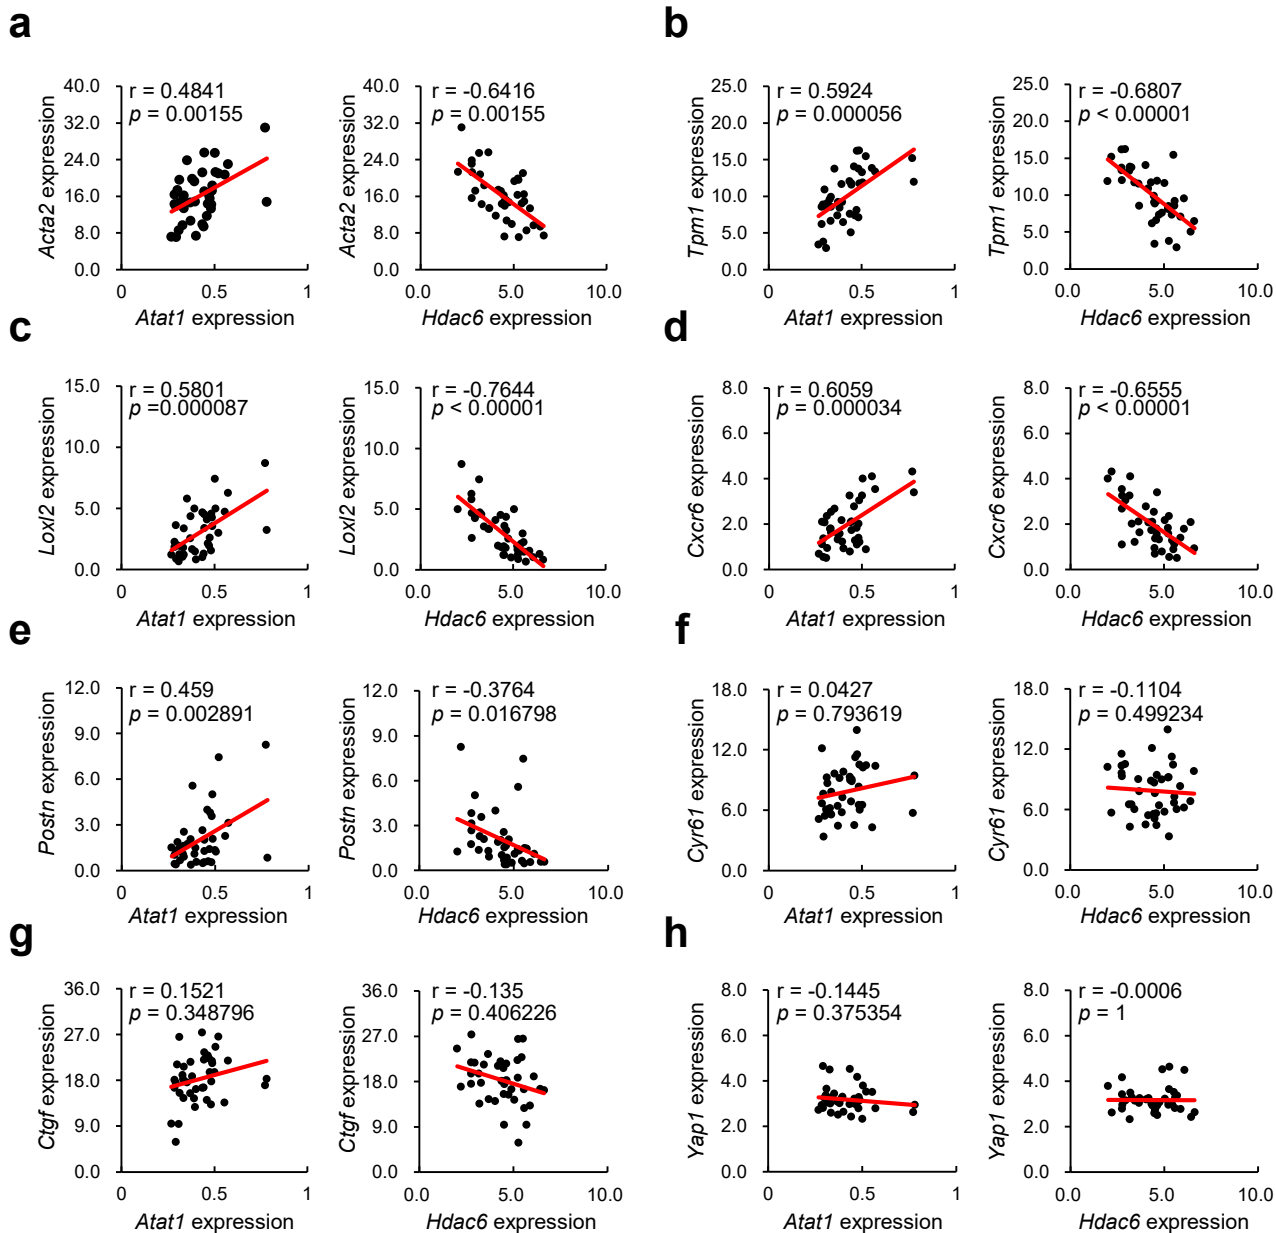

**Supplementary Fig. 8 Correlation plot of genes expression regulated by  $\alpha$ -TAT1 depending on *Atat1* and *Hdac6* in liver fibrosis tissue. a-h mRNA expression level of *Acta2*, *Tpm1*, *Lox12*, *Cxcr6*, *Postn*, *Cyr61*, *Ctgf* and *Yap1* with respect to *Atat1* and *Hdac6* mRNA expression in the liver tissue (40 liver cirrhosis patients; GSE25097). Pearson correlation coefficient ( $r$ ) and  $p$ -value ( $p$ ) from  $r$  were calculated.**



## Supplementary Table 1

| Gene     | Direction | Sequence (5' → 3')                                          |
|----------|-----------|-------------------------------------------------------------|
| shYAP    | Forward   | CCGGGAAGCGCTGAGTTCCGAAATCCTCGAGGATTTGGAACCTCAGCGCTTCTTTTTG  |
|          | Reverse   | AATTCAAAAAGAAGCGCTGAGTTCCGAAATCCTCGAGGATTTGGAACCTCAGCGCTTC  |
| shSmad2  | Forward   | CCGGTGGTGTTCATCGCATACTATCTCGAGATAGTATGCGATTGAACACCATTTTTG   |
|          | Reverse   | AATTCAAAAATGGTGTTCATCGCATACTATCTCGAGATAGTATGCGATTGAACACCA   |
| shLis1-1 | Forward   | CCGGGATCACAATGTCTCTTCAGTACTCGAGTACTGAAGAGACATTGTGATCTTTTTTG |
|          | Reverse   | AATTCAAAAAGATCACAATGTCTCTTCAGTACTCGAGTACTGAAGAGACATTGTGATC  |
| shLis1-2 | Forward   | CCGGGCAGATTATCTTCGTTCAAATCTCGAGATTTGAACGAAGATAATCTGCTTTTTTG |
|          | Reverse   | AATTCAAAAAGCAGATTATCTTCGTTCAAATCTCGAGATTTGAACGAAGATAATCTGC  |

## Supplementary Table 2

| Gene                      | Direction | Sequence (5' → 3')    |
|---------------------------|-----------|-----------------------|
| <i>Acta</i>               | Forward   | TCTTCCAGCCATCTTTCA    |
|                           | Reverse   | CCTGGGTACATGGTGGTA    |
| <i>Tagln</i>              | Forward   | CAGGTGGCTCAATTCTTG    |
|                           | Reverse   | TTTGGTCACAGCCAACT     |
| <i>Tpm1</i>               | Forward   | AGCTGGTTGAGGAGGAGT    |
|                           | Reverse   | TTGGGCTCGGCTTTCAAT    |
| <i>Cxcr6</i>              | Forward   | GCATACTTTCGGGCTTGC    |
|                           | Reverse   | TGAGAGAGGCAGCCGATA    |
| <i>Loxl2</i>              | Forward   | TGTGCCAACTTTGGAGAACA  |
|                           | Reverse   | GGCACTTCATAGTTGGGGTTA |
| <i>Postn</i>              | Forward   | ACCTGCAATGACGAAGATCC  |
|                           | Reverse   | GGATCACTTCTGTCACCGTT  |
| <i>Cyr61</i>              | Forward   | TTCCAGCCCAACTGTAAA    |
|                           | Reverse   | AACCCACTCTTCACAGCA    |
| <i>Ctgf</i>               | Forward   | TGCACCAAGTGTGAAGACA   |
|                           | Reverse   | AGGCACAGGTCTTGATGA    |
| <i>Yap1</i>               | Forward   | TGCGAGGTCATAGGTAAAGT  |
|                           | Reverse   | AATGGCCTCAAATGACTGAC  |
| <i>Smad2</i>              | Forward   | GAGAGTTGAGACCCAGT     |
|                           | Reverse   | TCCGAGTTTGATGGGTCT    |
| <i>Pafah1b1</i><br>(Lis1) | Forward   | ACGTGGAGTTCTGTTCCATT  |
|                           | Reverse   | GTCTTCATGCATCGCTTGTT  |
| <i>Gapdh</i>              | Forward   | TGGCAAAGTGGAGATTGT    |
|                           | Reverse   | CTTCCCGTTGATGACAAG    |
